# Supplementary material for: Controlled synthesis of ZnS nanocombs by self-evaporation using ZnS nanobelts as source and substrates
Source: Royal Society of Chemistry journal article supplement (doi:10.1039/c1ce05932g), 2011-11-11
Supplement: c1ce05932g.pdf [file c1ce05932g.pdf]

Supplementary Information to

## Controlled synthesis of ZnS nanocombs by self-evaporation using ZnS nanobelts as source and substrates

Changyong Lan,<sup>a</sup> Jiangfeng Gong,<sup>a,b</sup> Yuwen Jiang,<sup>a</sup> Yang Song,<sup>a</sup> and Shaoguang Yang<sup>\*a</sup>

<sup>a</sup> *Nanjing National Laboratory of Microstructures and Department of Physics, Nanjing University, Nanjing 210093, China. Fax: +86 25 83595539; Tel: +86 25 83597483; E-mail: [sgyang@nju.edu.cn](mailto:sgyang@nju.edu.cn)*

<sup>b</sup> *Department of Physics, Hohai University, Nanjing 210098, China*

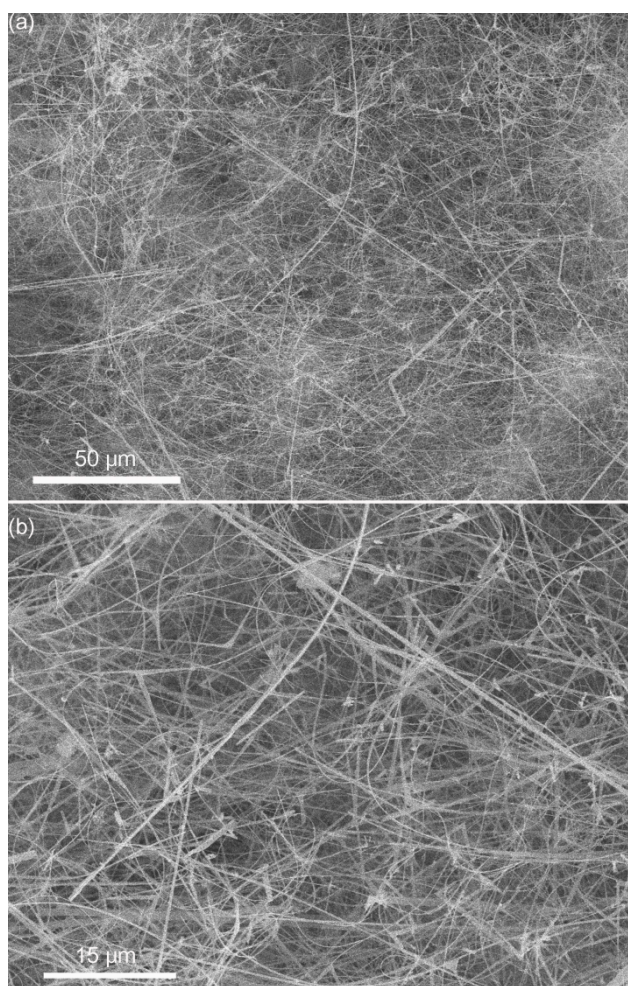

Figure s1. SEM images of the thin layer coated on the ZnS nanocombs under different magnification.

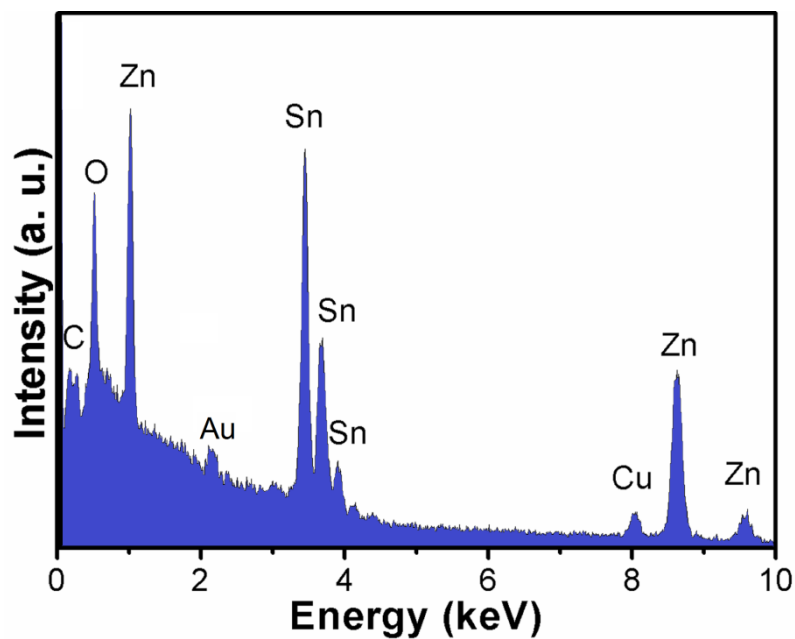

Figure s2. EDS spectrum of the thin layer coated on the ZnS nanocombs. For SEM and EDS characterization, the thin layer was pasted on Cu sheet with conductive adhesive. Cu and C signals originated from the conductive adhesive.
